# Supplementary material for: Synthesising protease-stable isopeptides by proteases: an efficient biocatalytic approach on the basis of a new type of substrate mimetics
Source: Royal Society of Chemistry journal article supplement (doi:10.1039/b105752a), 2001-01-01
Supplement: b105752a.doc [file b105752a.doc]

## Electronic supplementary information

**Materials.** V8 protease (EC 3.4.21.19) came from Fluka Chemie AG (Switzerland) and had a specific activity of 700 U/mg (1 U = amount of enzyme that hydrolyses 1 µmol/min *N*-Boc-L-Glu--phenyl ester at pH 7.8, 37 °C). Carboxymethyl thiol, coupling reagents, amino acid and peptide derivatives were purchased from Bachem (Switzerland), Fluka Chemie AG (Switzerland) or Merck (Germany). All reagents were of the highest available commercial purity. Solvents were purified and dried by usual methods.

**Chemical syntheses.** Z-protected peptide amides were prepared using standard coupling methods. Z-protected amino acid and peptide carboxymethyl thioesters were synthesised by coupling of the appropriate N- and C-terminal protected amino acid or peptide with carboxymethyl thiol using the mixed anhydride method (isobutylchloroformiate/4-ethylmorpholine). The amino acid derivatives Z-Glu(SCm)-OH and Z-Asp(SCm)-OH were obtained from Z-Glu(SCm)-OtBu and Z-Asp(SCm)-OtBu after deprotection of the *C*-carboxy group with trifluoroacetic acid. Pentapeptides were synthesised with a semiautomatic batch peptide synthesiser SP 650 (Labortech AG, Switzerland) using *p*-alkoxybenzyl alcohol resin prepared according to Wang1 and standard Fmoc chemistry. The peptides were precipitated with dry diethyl- or diisopropyl ether or mixtures of hexane/ethyl acetate and purified by HPLC. The identity and purity of all peptides and peptide esters were finally checked by analytical HPLC at 220 nm, NMR, thermospray mass spectroscopy and elementary analysis. In all cases satisfactory analytical data (± 0.4% for C, H, N) were found.

**Z-Glu(SCm)-OH.** 1H-NMR (300 MHz, DMSO)  1.92 (m, 4H, CH2, CH2, Glu), 3.69 (s, 2H, S‑CH2-CO), 4.06 (m, 1H, CH, Glu), 5.04 (s, 2H, CH2, Z), 7.37 (m, 5H, C6H5, Z), 7.91 (d, 1H, NH, Glu), 12.02 (s, 2H, S-CH2-COOH, COOH); MS, *m/z*, 354 [M-H]+.

**Z-Asp(SCm)-OH.** 1H-NMR (300 MHz, DMSO)  1.93 (m, 2H, CH2, Asp), 3.72 (s, 2H, S-CH2-CO), 4.14 (m, 1H, CH, Asp), 5.05 (s, 2H, CH2, Z), 7.37 (m, 5H, C6H5, Z), 12.28 (s, 2H, S-CH2-COOH, COOH); MS, *m/z*, 340 [M-H]+.

**Z-Ala-Glu(SCm)-NH2.** 1H-NMR (300 MHz, DMSO)  1.19 (d, 3H, CH3, Ala), 2.01 (m, 4H, CH2, CH2, Glu), 3.76 (s, 2H, S-CH2-CO), 4.12 (m, 2H, CH, Ala, Glu), 5.18 (d, 2H, CH2, Z), 6.94 (s, s, 2H, NH2), 7.38 (m, 5H, C6H5, Z), 8.19 (m, 2H, NH, Ala, Glu), 12.26 (s, 1H, S-CH2-COOH); MS, *m/z*, 426 [M+H]+.

**Z-Ala-Asp(SCm)-NH2.** 1H-NMR (300 MHz, DMSO)  1.23 (d, 3H, CH3, Ala), 1.88 (m, 2H, CH2, Asp), 3.72 (s, 2H, S-CH2-CO), 4.06 (m, 2H, CH, Ala, Asp), 5.04 (d, 2H, CH2, Z), 6.98 (s, s, 2H, NH2), 7.35 (m, 5H, C6H5, Z), 8.08 (m, 2H, NH, Ala, Asp), 12.30 (s, 1H, S-CH2-COOH); MS, *m/z*, 412 [M+H]+.

**Z-Glu(SCm)-Ala-NH2.** 1H-NMR (300 MHz, DMSO)  1.14 (d, 3H, CH3, Ala), 1.83 (m, 4H, CH2, CH2, Glu), 3.72 (s, 2H, S-CH2-CO), 4.08 (m, 2H, CH, Ala, Glu), 5.11 (d, 2H, CH2, Z), 6.97 (s, s, 2H, NH2), 7.38 (m, 5H, C6H5, Z), 8.27 (m, 2H, NH, Ala, Glu), 12.44 (s, 1H, S-CH2-COOH); MS, *m/z*, 426 [M+H]+.

**Z-Asp(SCm)-Ala-NH2.** 1H-NMR (300 MHz, DMSO)  1.21 (d, 3H, CH3, Ala), 1.92 (m, 2H, CH2, Asp), 3.67 (s, 2H, S-CH2-CO), 4.09 (m, 2H, CH, Ala, Asp), 5.05 (d, 2H, CH2, Z), 7.01 (s, s, 2H, NH2), 7.33 (m, 5H, C6H5, Z), 7.98 (m, 2H, NH, Ala, Asp), 12.02 (s, 1H, S-CH2-COOH); MS, *m/z*, 412 [M+H]+.

**Z-Ala-Ala-Glu(SCm)-NH2.** 1H-NMR (300 MHz, DMSO)  1.20 (m, 6H, CH3, Ala, Ala), 1.94 (m, 4H, CH2, CH2, Glu), 3.75 (s, 2H, S-CH2-CO), 4.07 (m, 3H, CH, Ala, Ala, Glu), 5.24 (d, 2H, CH2, Z), 7.09 (s, s, 2H, NH2), 7.39 (m, 5H, C6H5, Z), 8.12 (m, 3H, NH, Ala, Ala, Glu), 12.64 (s, 1H, S-CH2-COOH); MS, *m/z*, 497 [M+H]+.

**Z-Ala-Ala-Asp(SCm)-NH2.** 1H-NMR (300 MHz, DMSO)  1.27 (m, 6H, CH3, Ala, Ala), 1.93 (m, 2H, CH2, Asp), 3.73 (s, 2H, S-CH2-CO), 4.06 (m, 3H, CH, Ala, Ala, Asp), 5.05 (d, 2H, CH2, Z), 7.02 (s, s, 2H, NH2), 7.38 (m, 5H, C6H5, Z), 8.00 (m, 3H, NH, Ala, Ala, Asp), 12.52 (s, 1H, S-CH2-COOH); MS, *m/z*, 483 [M+H]+.

**Z-Glu(SCm)-Ala-Ala-NH2.** 1H-NMR (300 MHz, DMSO)  1.19 (m, 6H, CH3, Ala, Ala), 1.91 (m, 4H, CH2, CH2, Glu), 3.70 (s, 2H, S-CH2-CO), 4.04 (m, 3H, CH, Ala, Ala, Glu), 5.30 (d, 2H, CH2, Z), 7.10 (s, s, 2H, NH2), 7.36 (m, 5H, C6H5, Z), 8.00 (m, 3H, NH, Ala, Ala, Glu), 12.51 (s, 1H, S-CH2-COOH); MS, *m/z*, 497 [M+H]+.

**Z-Asp(SCm)-Ala-Ala-NH2.** 1H-NMR (300 MHz, DMSO)  1.21 (m, 6H, CH3, Ala, Ala), 1.92 (m, 2H, CH2, Asp), 3.73 (s, 2H, S-CH2-CO), 4.07 (m, 3H, CH, Ala, Ala, Asp), 5.05 (d, 2H, CH2, Z), 6.94 (s, s, 2H, NH2), 7.36 (m, 5H, C6H5, Z), 8.02 (m, 3H, NH, Ala, Ala, Asp), 12.64 (s, 1H, S-CH2-COOH); MS, *m/z*, 483 [M+H]+.

**Z-Ala-Glu(SCm)-Ala-NH2.** 1H-NMR (300 MHz, DMSO)  1.20 (m, 6H, CH3, Ala, Ala), 1.90 (m, 4H, CH2, CH2, Glu), 3.70 (s, 2H, S-CH2-CO), 3.99 (m, 3H, CH, Ala, Ala, Glu), 5.20 (d, 2H, CH2, Z), 7.01 (s, s, 2H, NH2), 7.35 (m, 5H, C6H5, Z), 8.03 (m, 3H, NH, Ala, Ala, Glu), 12.60 (s, 1H, S-CH2-COOH); MS, *m/z*, 497 [M+H]+.

**Z-Ala-Asp(SCm)-Ala-NH2.** 1H-NMR (300 MHz, DMSO)  1.20 (m, 6H, CH3, Ala, Ala), 1.89 (m, 2H, CH2, Asp), 3.70 (s, 2H, S-CH2-CO), 4.01 (m, 3H, CH, Ala, Ala, Asp), 5.13 (d, 2H, CH2, Z), 7.09 (s, s, 2H, NH2), 7.35 (m, 5H, C6H5, Z), 8.12 (m, 3H, NH, Ala, Ala, Asp), 12.41 (s, 1H, S-CH2-COOH); MS, *m/z*, 483 [M+H]+.

**Z-Ala-Ala-Glu(SCm)-Ala-Ala-NH2.** 1H-NMR (300 MHz, DMSO)  1.27 (m, 12H, CH3, Ala, Ala, Ala, Ala), 2.06 (m, 4H, CH2, CH2, Glu), 3.70 (s, 2H, S-CH2-CO), 4.12 (m, 5H, CH, Ala, Ala, Ala, Ala, Glu), 5.01 (d, 2H, CH2, Z), 7.09 (s, s, 2H, NH2), 7.34 (m, 5H, C6H5, Z), 8.12 (m, 5H, NH, Ala, Ala, Ala, Ala, Glu), 12.26 (s, 1H, S-CH2-COOH); MS, *m/z*, 639 [M+H]+.

**Z-Ala-Ala-Asp(SCm)-Ala-Ala-NH2.** 1H-NMR (300 MHz, DMSO)  1.20 (m, 12H, CH3, Ala, Ala, Ala, Ala), 1.94 (m, 2H, CH2, Asp), 3.69 (s, 2H, S-CH2-CO), 4.18 (m, 5H, CH, Ala, Ala, Ala, Ala, Asp), 5.11 (d, 2H, CH2, Z), 7.08 (s, s, 2H, NH2), 7.38 (m, 5H, C6H5, Z), 7.95 (m, 5H, NH, Ala, Ala, Ala, Ala, Asp), 12.29 (s, 1H, S-CH2-COOH); MS, *m/z*, 625 [M+H]+.

**Enzymatic syntheses.** Enzymatic reactions were performed in a total volume of 200 µl containing 0.2 M *N*-(2-hydroxyethyl)piperazine-*N*-(2-ethanesulfonic acid) (Hepes) buffer, pH 8.0 at 37 °C. Stock solutions of donor peptide esters (4 mM) and acceptor peptides (30 mM) were prepared in 0.2 M Hepes buffer, pH 8.0. To neutralise hydrochlorides, hydrobromides or trifluoroacetates appropriate equivalents of NaOH were added to the stock solutions of the peptides. The final concentrations of donor and acceptor components were 2 mM and 15 mM, respectively. The latter was calculated as free, *N*-unprotonated nucleophilic concentration [HN]0 according to the formalism of Henderson-Hasselbalch [HN]0 = [N]0/(1 + 10p*K*-pH).2 The p*K* values of the -amino group of amino acid derivatives and peptides were determined by inflection point titration on a Video Titrator VIT 90 (Radiometer, Denmark). After thermal equilibration of assay mixtures, the synthesis reactions were initiated by addition of V8 protease resulting in final enzyme concentrations of 3.6 – 24.7 µM. Reaction times of 5 – 20 hours led to a complete ester consumption. For the HPLC analysis, aliquots were withdrawn and diluted with a quenching solution of 50% aqueous methanol containing 5% trifluoroacetic acid. For each reaction an experiment without enzyme was performed for determining the extent of spontaneous ester hydrolysis and aminolysis. The identity of the formed peptide products was verified by thermospray mass spectroscopy.

**HPLC analyses.** Measurements were performed with a Shimadzu LC-10A or Bischoff HPLC system using analytical reversed phase C18 and C8 columns (LiChrospher, 5 µm, 250  4 mm, Merck, Germany; Grom Capcell, 5 µm, 250  4.6 mm, Shiseido, Japan). Samples were eluted with various mixtures of acetonitrile/water containing 0.1% trifluoroacetic acid under gradient conditions at flow rates of 1.0 ml/min. Detection was at 254 nm monitoring the aromatic chromophore (*N*-benzyloxycarbonyl moiety) within the donor peptide. The product yields were calculated from peak areas of the isopeptide product and the hydrolysis product as the only side product of synthesis.

**References**

1 S. S. Wang, *J. Am. Chem. Soc.*, 1973, **95**, 1328.

2 V. Schellenberger, A. Könnecke, H.-D. Jakubke, in *Peptides 1984*, ed. U. Ragnarsson, Almqvist and Wirksell, Stockholm, 1984, 201.
